# Supplementary material for: Circulating endothelial cells and angiogenic serum factors during neoadjuvant chemotherapy of primary breast cancer
Source: PubMed Central journal article supplement (PMC2361171; doi:10.1038/sj.bjc.6602952), 2006-01-31

# Supplementary Figure 1

## A) Mature CEC

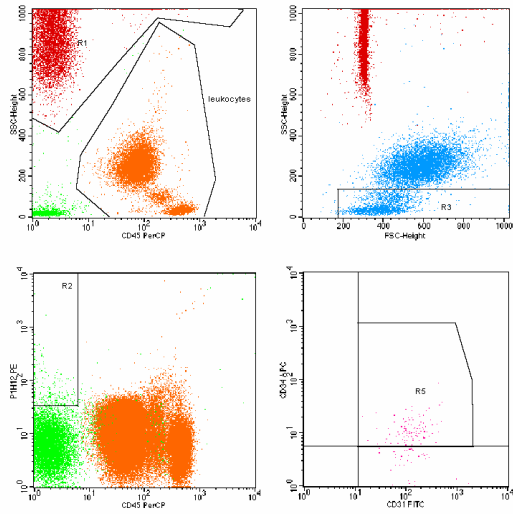

## B) Activated CEC

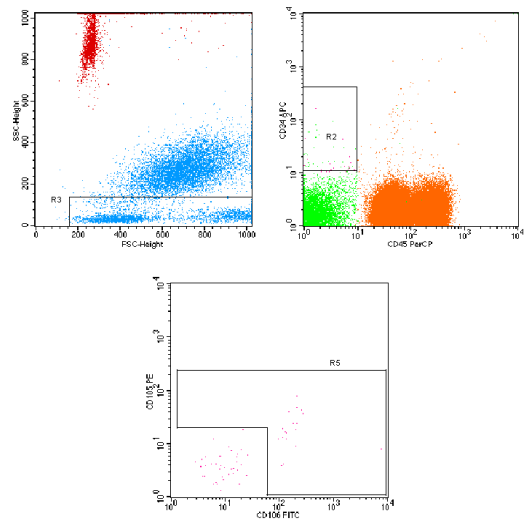

## C) CD34 and CD133/CD34-positive cells

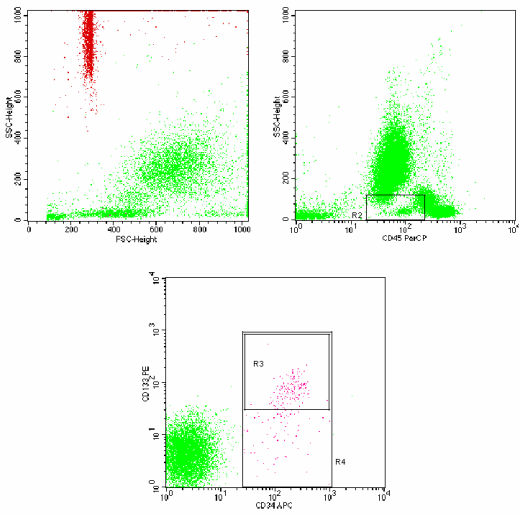

## D) EPC

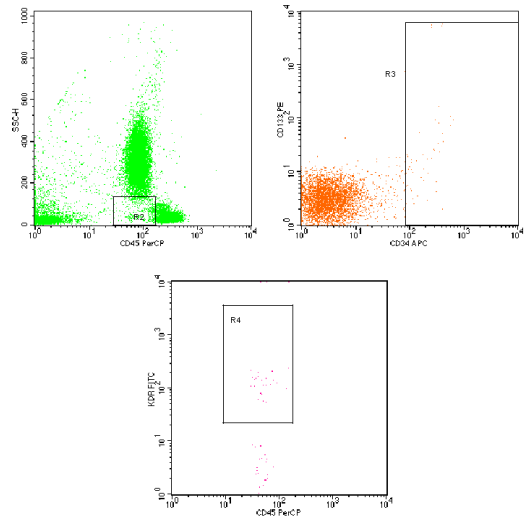

Supplement: 94-6602952x1.pdf [file 94-6602952x1.pdf]
